# Supplementary material
Source: Royal Society of Chemistry journal article supplement (doi:10.1039/d6py00288a)
Supplement: d6py00288a5.pdf [file d6py00288a5.pdf]

Supporting information for

## Ultra-high molecular weight tanglemer hydrogels

Md Saifur Rahaman, Brett Leslie Pollard, Luke A. Connal\*

Research School of Chemistry, The Australian National University, Canberra, ACT 2601, Australia.

\*Corresponding Author

---

### Table of contents

**Table S1: Different polymerization parameters with gel fraction of hydrogels.**

**Figure S1: Digital photograph of polymerization setup (Purple LED light,  $\lambda_{max} = 365$  nm)**

**Figure S2: Effect of polymerization time variation with  $DP_{target} = 50000$  and 0.1 mole % PEGDA on the mechanical strength and swelling ratio of the hydrogel..**

**Figure S3: Digital photograph of the A) liquid hydrogel with  $DP_{target} = 500$  with 1 M HEA and 0.1 mole% PEGDA, B) Polymer with 0.5M HEA (left) and Hydrogel with same concentration (right), C) Polymer with 1M HEA concentration after 7 days of swelling in RO water.**

**Figure S4. GPC trace of linear PHEA synthesized at  $DP_{target} = 50,000$  ( $M_n^{GPC} = 4.4$  MDa,  $D = 1.358$ )**

**Figure S5: FTIR-ATR spectra of HEA monomer (black line) along with hydrogels with different concentrations (red line = 1 M, blue line = 5 M) and 0.1 mol% PEGDA crosslinker.**

**Figure S6: Effect of A) crosslinker mol% of 1M PHEA hydrogel, B) monomer concentrations and B) crosslinker mol% with 5M PHEA hydrogel on the Young's modulus (kPa) (blue line) and Fracture strain (%) (orange line).**

**Figure S7: Photographs of the optimized PHEA tanglemer hydrogel (5.0 M HEA,  $DP_{target} = 50,000$ , 0.005 mol% PEGDA) in A) different shapes and B) under various deformation modes.**

**Figure S8. Scanning electron microscopy (SEM) images of the freeze-dried optimized PHEA tanglemer hydrogel (5.0 M HEA, 0.005 mol% PEGDA,  $DP_{target} = 50,000$ ) at (A) 2000x and (B) 5000x and (C) 10000x magnification.**

**Table S1: Different polymerization parameters with gel fraction of hydrogels.**

| <b>DP<sub>target</sub> variation</b>                     | <b>Gel Fraction (%)</b> | <b>Constants<br/>(Crosslinker mol%)</b>                                  | <b>Monomer:<br/>crosslinker<br/>mole ratio</b> | <b>Crosslinker:CTA<br/>ratio</b> |
|----------------------------------------------------------|-------------------------|--------------------------------------------------------------------------|------------------------------------------------|----------------------------------|
| <b>500</b>                                               | <b>96.07 ± 0.86</b>     | <b>1</b>                                                                 | <b>100</b>                                     | <b>5</b>                         |
| <b>1000</b>                                              | <b>96.27 ± 2.20</b>     | <b>0.1</b>                                                               | <b>1000</b>                                    | <b>1</b>                         |
| <b>5000</b>                                              | <b>98.63 ± 0.40</b>     | <b>0.1</b>                                                               | <b>1000</b>                                    | <b>5</b>                         |
| <b>10000</b>                                             | <b>98.54 ± 0.36</b>     | <b>0.1</b>                                                               | <b>1000</b>                                    | <b>10</b>                        |
| <b>25000</b>                                             | <b>98.66 ± 1.25</b>     | <b>0.1</b>                                                               | <b>1000</b>                                    | <b>25</b>                        |
| <b>50000</b>                                             | <b>98.89 ± 0.24</b>     | <b>0.1</b>                                                               | <b>1000</b>                                    | <b>50</b>                        |
| <b>Crosslinker Mole<br/>% variation</b>                  | <b>Gel Fraction (%)</b> | <b>Constants (DP<sub>target</sub>)</b>                                   | <b>Monomer to x-<br/>linker mole<br/>ratio</b> | <b>Crosslinker:CTA<br/>ratio</b> |
| <b>0.05</b>                                              | <b>98.39 ± 1.51</b>     | 50000                                                                    | 2000                                           | 25                               |
| <b>0.1</b>                                               | <b>98.58 ± 0.10</b>     | 50000                                                                    | 1000                                           | 50                               |
| <b>0.5</b>                                               | <b>98.11 ± 1.25</b>     | 50000                                                                    | 200                                            | 250                              |
| <b>1</b>                                                 | <b>97.73 ± 1.52</b>     | 50000                                                                    | 100                                            | 500                              |
| <b>2</b>                                                 | <b>98.80 ± 0.66</b>     | 50000                                                                    | 50                                             | 1000                             |
| <b>Monomer<br/>concentration<br/>variation</b>           | <b>Gel Fraction (%)</b> | <b>Constants (DP<sub>target</sub><br/>&amp; mole % PEGDA)</b>            | <b>Monomer to x-<br/>linker mole<br/>ratio</b> | <b>Crosslinker:CTA<br/>ratio</b> |
| <b>0.5</b>                                               | <b>98.11 ± 0.32</b>     | 50000 & 0.1 %                                                            | 50                                             | 1000                             |
| <b>1</b>                                                 | <b>98.08 ± 0.30</b>     | 50000 & 0.1 %                                                            | 50                                             | 1000                             |
| <b>3</b>                                                 | <b>98.37 ± 0.02</b>     | 50000 & 0.1 %                                                            | 50                                             | 1000                             |
| <b>5</b>                                                 | <b>97.65 ± 2.59</b>     | 50000 & 0.1 %                                                            | 50                                             | 1000                             |
| <b>Crosslinker Mole %<br/>variation with 5 M<br/>HEA</b> | <b>Gel Fraction (%)</b> | <b>Constants (DP<sub>target</sub><br/>and monomer<br/>concentration)</b> | <b>Monomer to x-<br/>linker mole<br/>ratio</b> | <b>Crosslinker:CTA<br/>ratio</b> |
| <b>1</b>                                                 | <b>99.22 ± 1.11</b>     | 50000 & 5 M                                                              | 100                                            | 500                              |
| <b>0.1</b>                                               | <b>98.51 ± 0.57</b>     | 50000 & 5 M                                                              | 50                                             | 1000                             |
| <b>0.05</b>                                              | <b>98.50 ± 1.11</b>     | 50000 & 5 M                                                              | 25                                             | 2000                             |
| <b>0.005</b>                                             | <b>98.45 ± 0.35</b>     | 50000 & 5 M                                                              | 2.5                                            | 20000                            |
| <b>0.001</b>                                             | <b>98.66 ± 0.27</b>     | 50000 & 5 M                                                              | 0.5                                            | 1000000                          |

Air stream for cooling

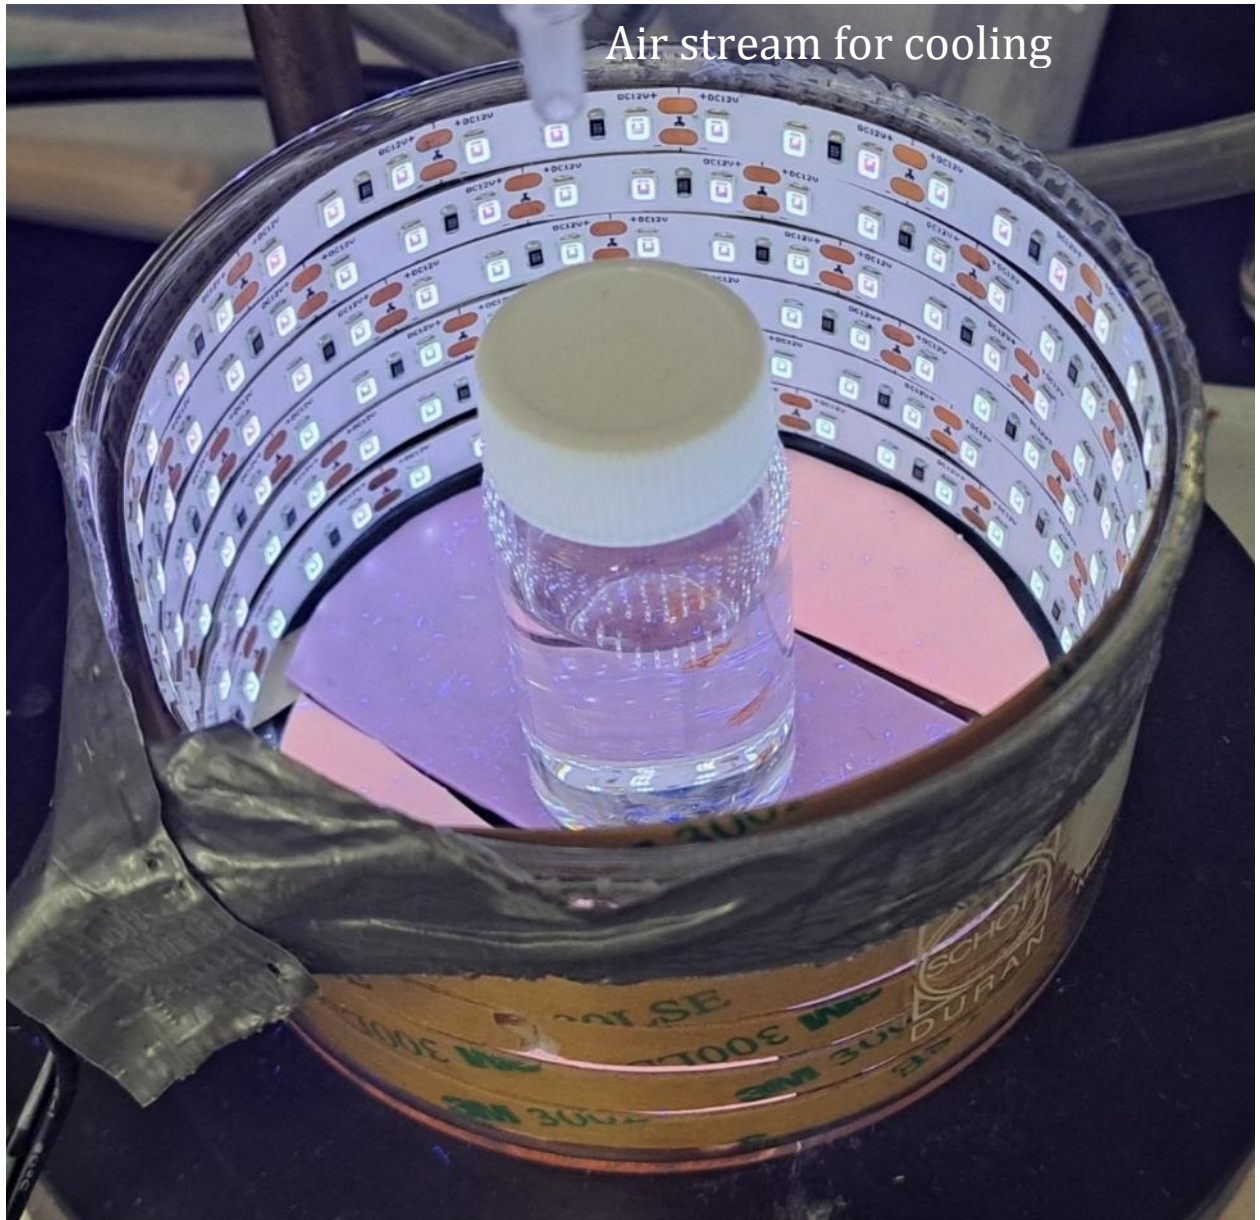

**Figure S1: Digital photograph of polymerization setup (14 W/m 12V Purple LED lights,  
 $\lambda_{max} = 365$  nm)**

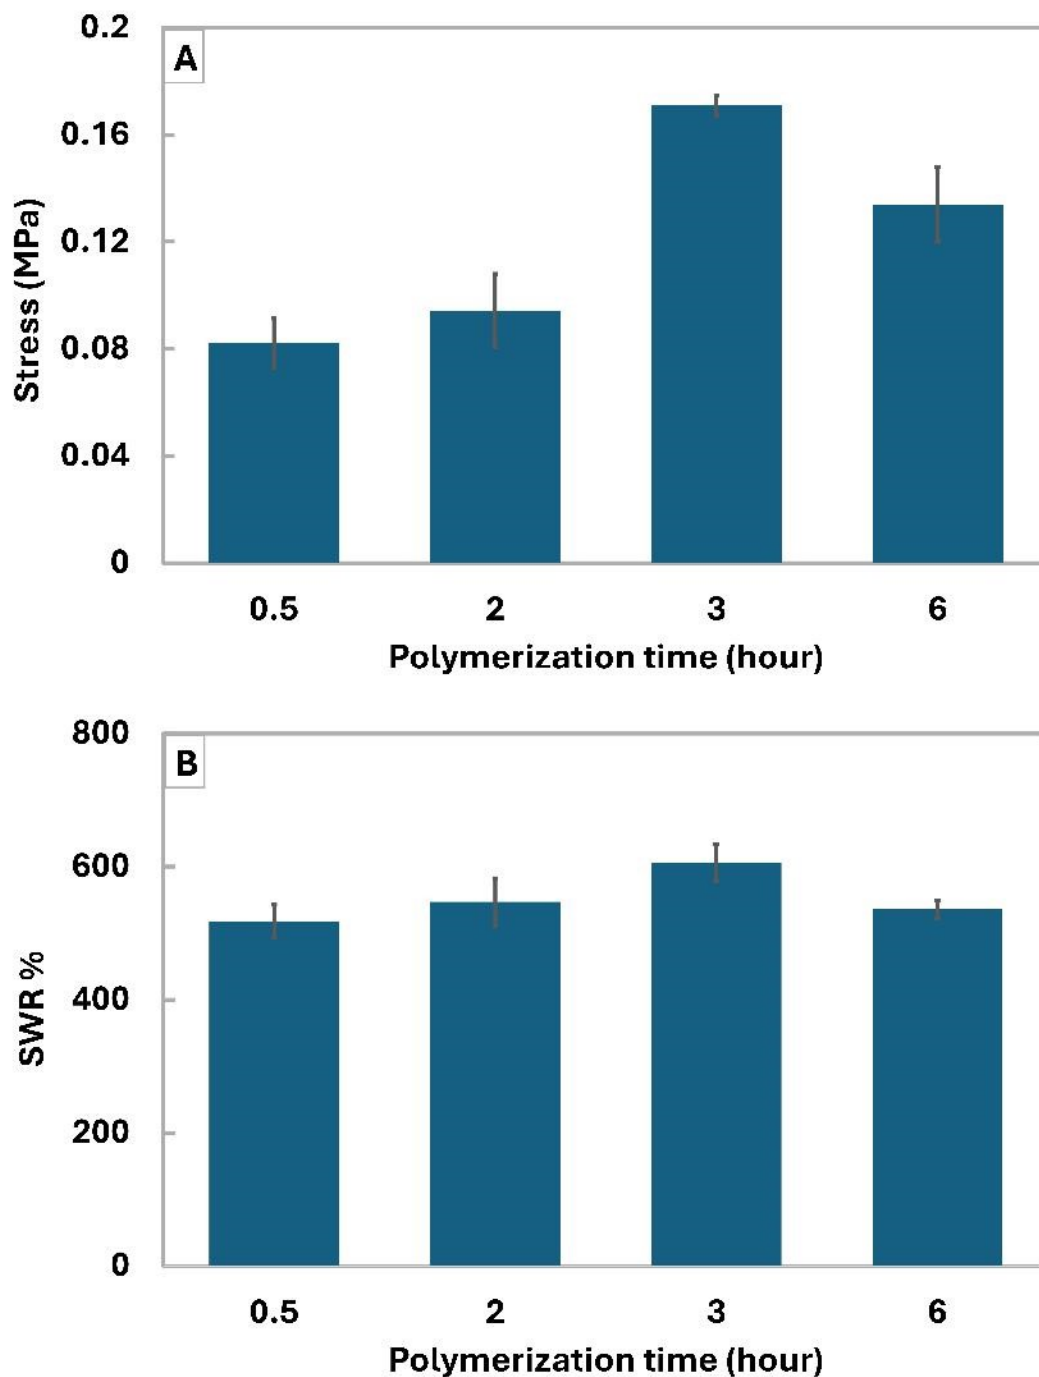

Figure S2: Effect of polymerization time variation with DPtarget 50000 and 0.1 mole % PEGDA on the A) mechanical strength and B) swelling ratio of the hydrogel.

A

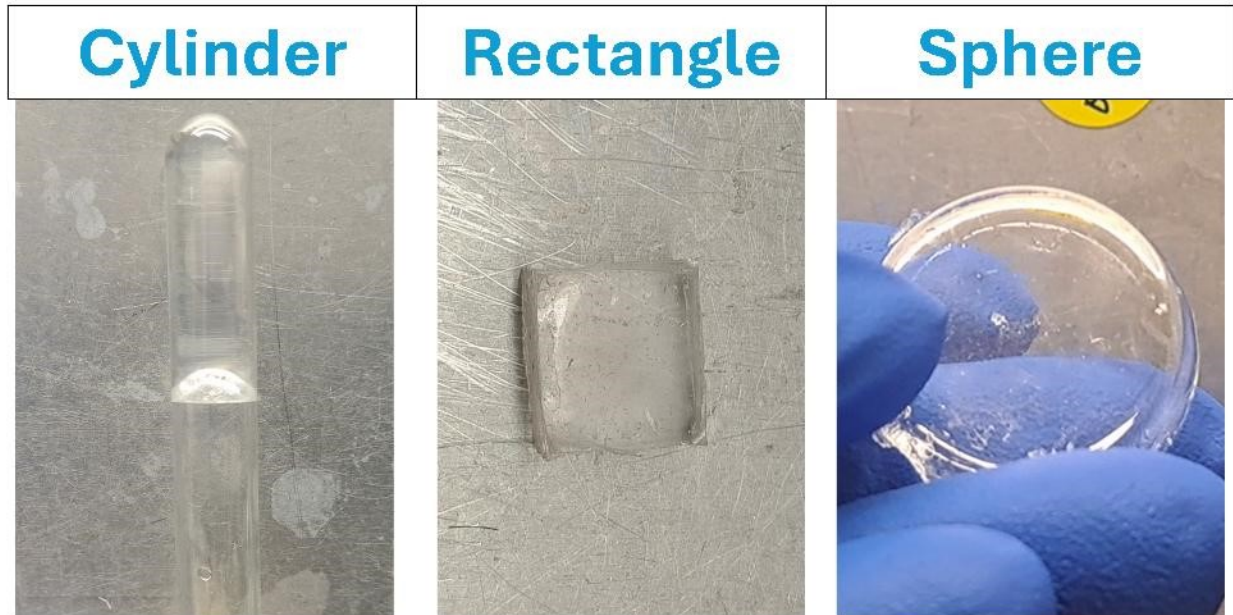

B

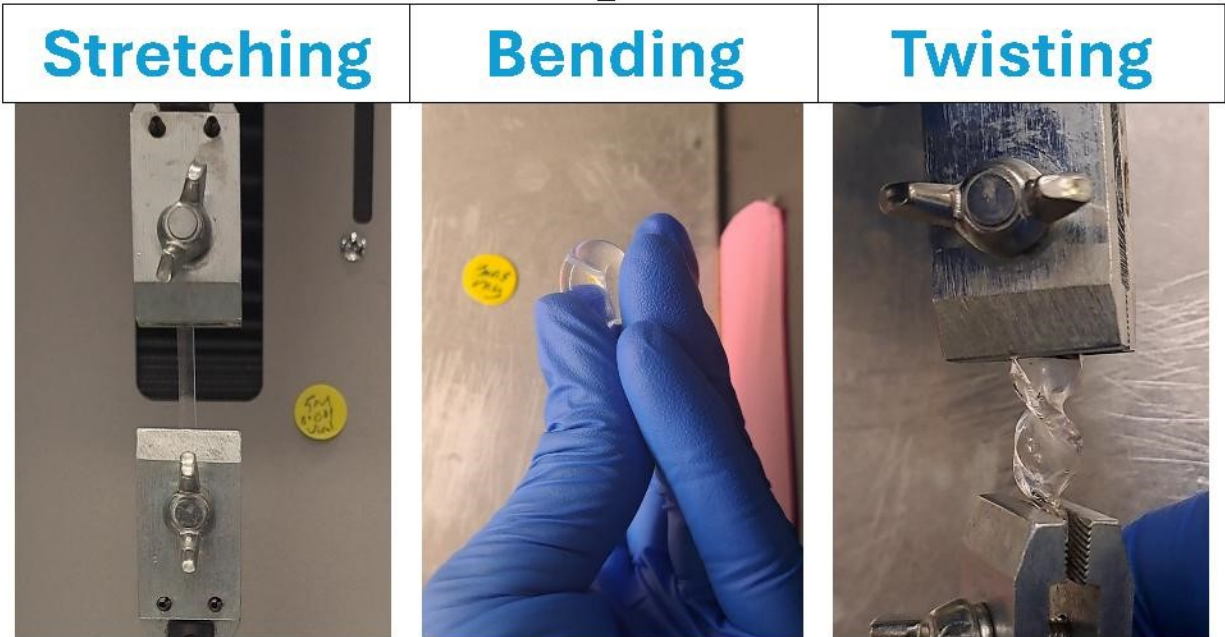

**Figure S3: Digital photograph of the A) liquid hydrogel with  $DP_{target} = 500$  with 1 M HEA and 0.1 mole% PEGDA, B) Polymer with 0.5M HEA (left) and Hydrogel with same concentration (right), C) Polymer with 1M HEA concentration after 7 days of swelling in RO water.**

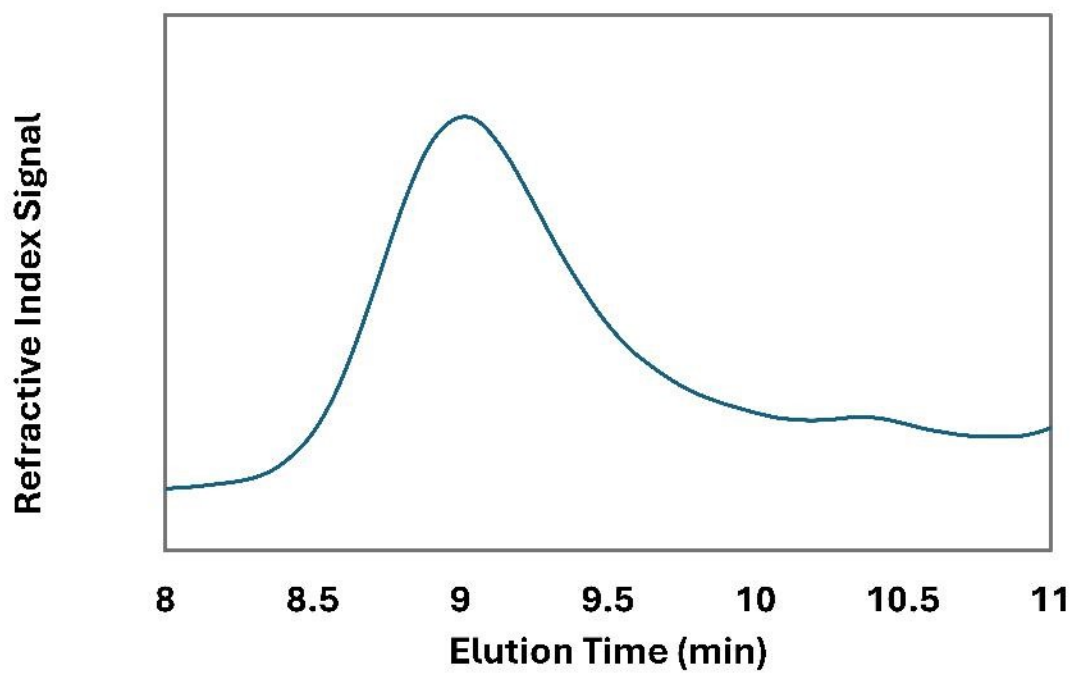

Figure S4. GPC trace of linear PHEA synthesized at  $DP_{\text{target}} = 50,000$  ( $M_n^{\text{GPC}} = 4.4$  MDa,  $D = 1.358$ )

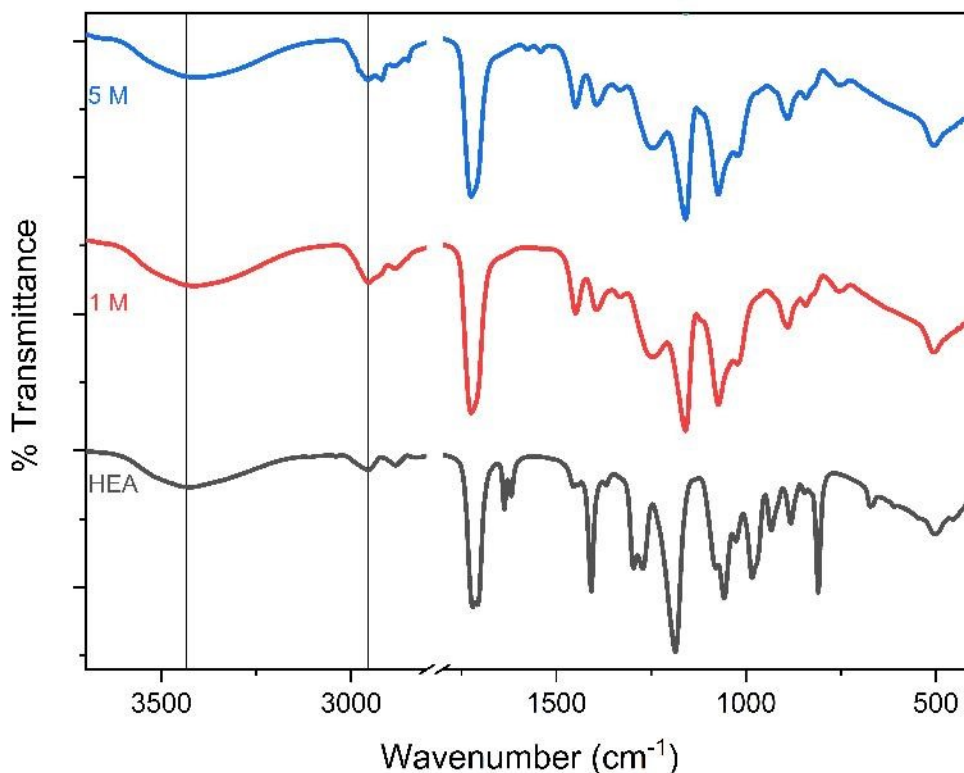

**Figure S5: FTIR-ATR spectra of HEA monomer (black line) along with hydrogels with different concentrations (red line = 1.0 M, blue line = 5.0 M) and 0.1 mole% PEGDA crosslinker.**

### FTIR-ATR of the hydrogel

The FTIR-ATR spectrum of 2-hydroxyethyl acrylate (HEA) and its polymer (PHEA) show several characteristic absorption bands that provide crucial information about the molecular structure and chemical environment. For the HEA monomer, the broad absorption band appearing around 3300-3500  $\text{cm}^{-1}$  corresponds to the hydrogen bonded hydroxyl (-OH) stretching vibration (Lee et al., 2004; Vargun & Usanmaz, 2005). For the hydrogels there is an enhanced intensity and signal complexity in the 2800 - 3000  $\text{cm}^{-1}$  region for the peaks associated with the aliphatic side chain of HEA, including C-H stretching vibrations (Smith, 2022). The carbonyl group (C=O) peak of HEA appears at 1721  $\text{cm}^{-1}$ . This peak is slightly blue shifted in the hydrogels (1725 and 1724  $\text{cm}^{-1}$  for 1.0 M and 5.0 M, respectively) due the contribution from the PEGDA crosslinker (Lukatsky et al., 2024; Fockaert et al., 2020; Smith, 2022). The acrylate double bond (-C=C-) for HEA at 1638  $\text{cm}^{-1}$

disappeared in the hydrogel indicating that the polymerization reaction was complete and any residual monomer had been removed. (Vargun & Usanmaz, 2005; Lee et al., 2004). The peak at  $1455\text{ cm}^{-1}$ , corresponding to  $\text{CH}_2$  bending vibrations for HEA, showed an increased intensity due to the ordered polymer chain packing in the hydrogel (Thompson et al., 2015).

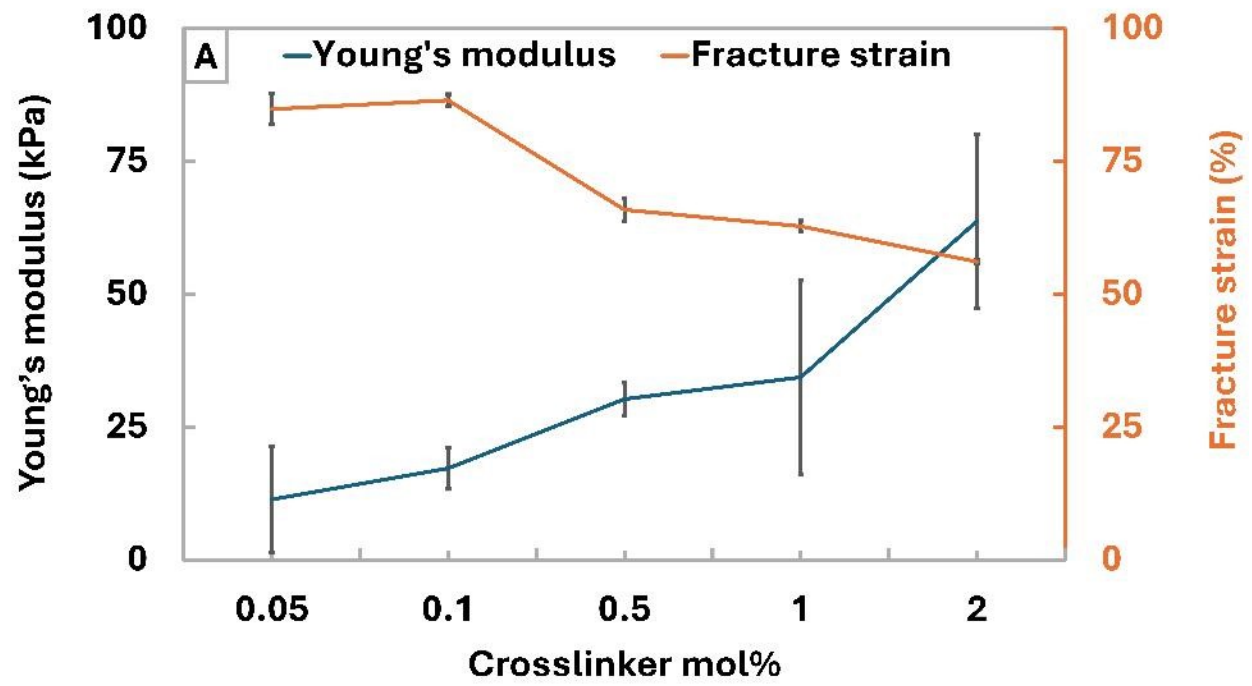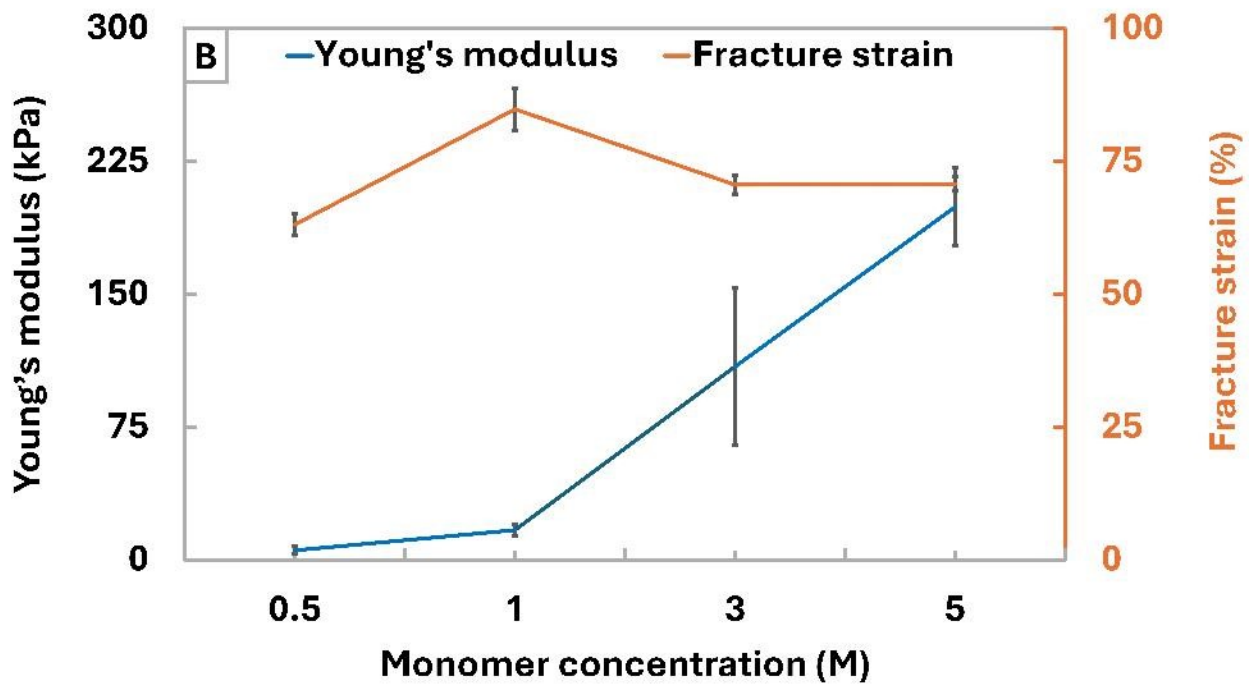

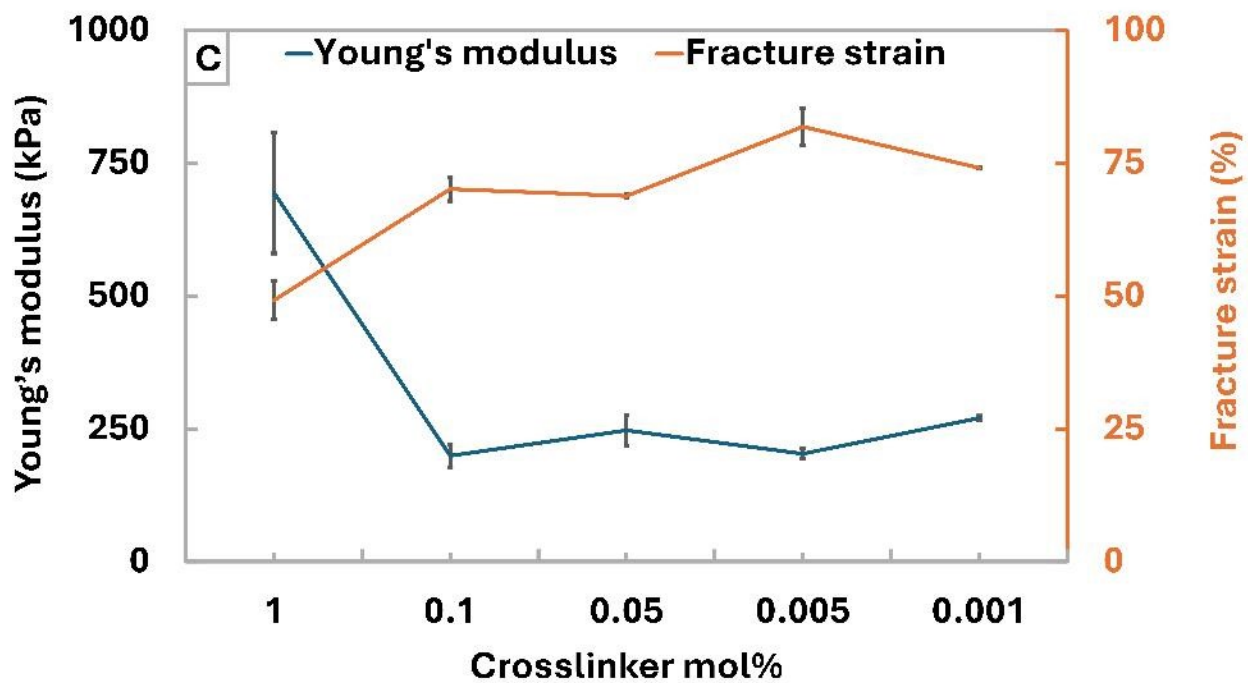

Figure S6: Effect of A) crosslinker mol% of 1M PHEA hydrogel, B) monomer concentrations and B) crosslinker mol% with 5M PHEA hydrogel on the Young's modulus (kPa) (blue line) and Fracture strain (%) (orange line).

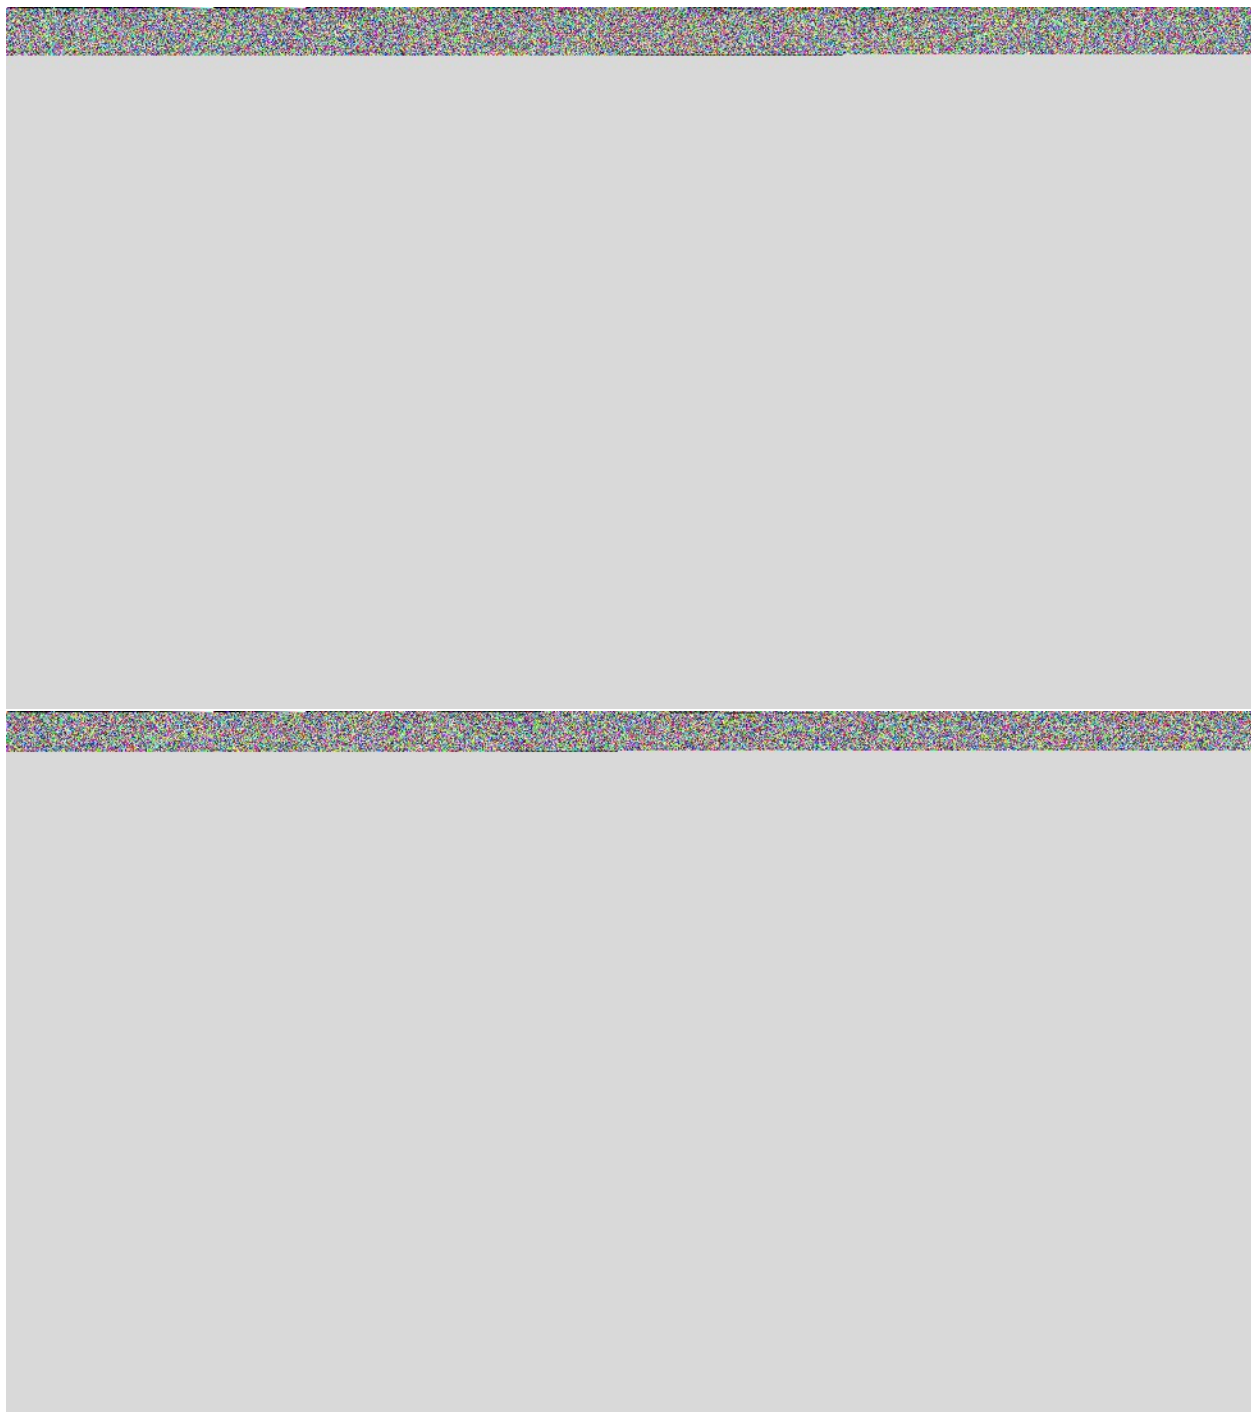

**Figure S7: Photographs of the optimized PHEA tanglemer hydrogel (5.0 M HEA,  $DP_{\text{target}} = 50,000$ , 0.005 mol% PEGDA) in A) different shapes and B) under various deformation modes.**

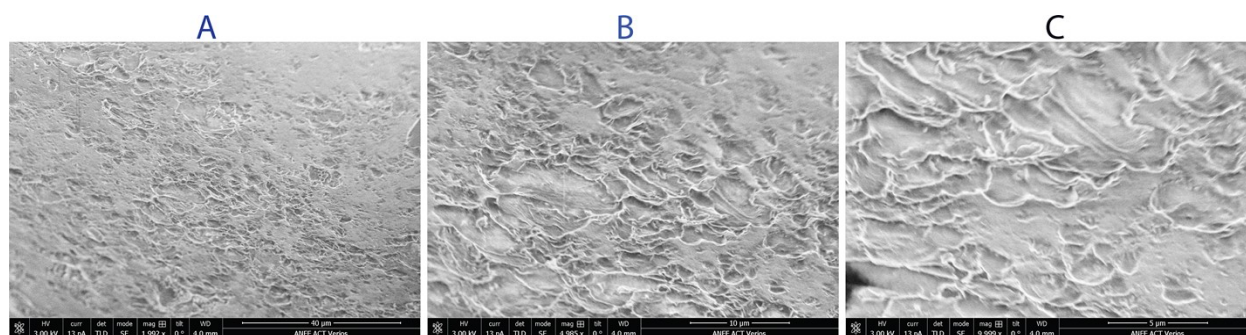

**Figure S8. Scanning electron microscopy (SEM) images of the freeze-dried optimized PHEA tanglemer hydrogel (5.0 M HEA, 0.005 mol% PEGDA,  $DP_{\text{target}}$  50,000) at (A) 2000x and (B) 5000x and (C) 10000x magnification.**

Optimized hydrogel (5.0 M HEA, 0.005 mol% PEGDA,  $DP_{\text{target}}$  50,000) was freeze-dried for morphological study of the tanglemer network by scanning electron microscopy (SEM) (Figure S8). Molecular-level topological entanglements cannot be directly resolved by standard SEM, but that is not expected as the length scales of entanglement can not be easily imaged.

## References

- Lee, T. Y., Roper, T. M., Jönsson, E. S., Guymon, C. A., & Hoyle, C. E. (2004). Influence of hydrogen bonding on photopolymerization rate of hydroxyalkyl acrylates. *Macromolecules*, 37(10), 3659-3665. <https://doi.org/10.1021/ma0305277>
- Lukatsky, A. T. D., Miranda, B., Duarte, A. R. C., & Paiva, A. (2024). Hydrogels based on crosslinked polyethylene glycol diacrylate (PEGDA) for biomedical applications. *European Polymer Journal*, 214, 112176. <https://doi.org/10.1016/j.eurpolymj.2024.112990>
- Smith, B. (2022). The infrared spectra of polymers, VII: Polymers with carbonyl (C=O) bonds. *Spectroscopy*, 37(7), 14-21. <https://doi.org/10.56530/spectroscopy.tz9280y5>
- Thompson, D. L., Wagener, K. B., Schulze, U., Voit, B., Jehnichen, D., & Malanin, M. (2015). Spectroscopic examinations of hydrogen bonding in hydroxy-functionalized ADMET chemistry. *Macromolecular rapid communications*, 36(1), 60–64. <https://doi.org/10.1002/marc.201400545>
- Vargun, E., & Usanmaz, A. (2005). Polymerization of 2-hydroxyethyl acrylate in bulk and solution by chemical initiator and by ATRP method. *Journal of Polymer Science Part A: Polymer Chemistry*, 43(17), 3957-3965. <https://doi.org/10.1002/pola.20867>
